# Supplementary material for: Altered Functional Connectivity Density in Type 2 Diabetes Mellitus with and without Mild Cognitive Impairment
Source: MDPI journal article supplement (doi:10.3390/brainsci13010144), 2023-01-13
Supplement: s1 [file s1]

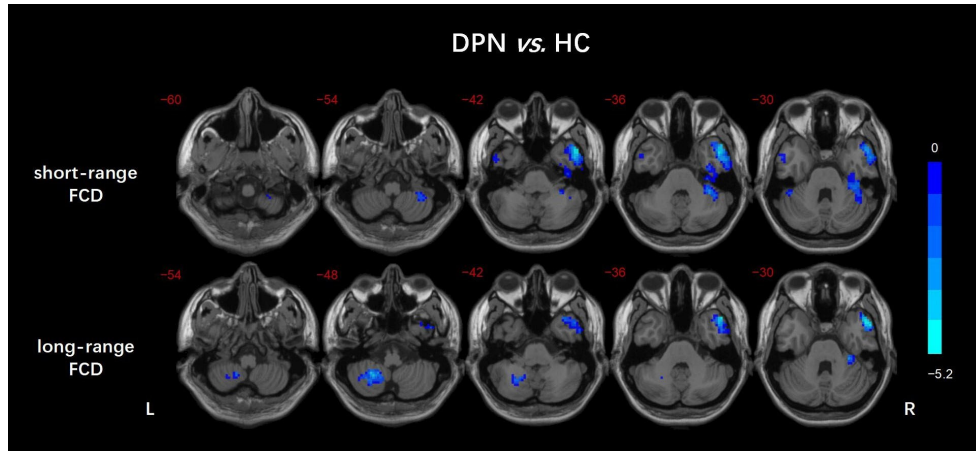

**Figure S1.** Comparison of short- and long- range FCDs between patients with diabetic peripheral neuropathy (DPN) and HCs (two-sample t-test: GRF corrected  $p < 0.005$ , cluster level  $p < 0.05$ ). The color scale denotes the t-value. L, left; R, right.
